# Supplementary material for: Electrochemical water splitting by gold: evidence for an oxide decomposition mechanism
Source: Royal Society of Chemistry journal article supplement (doi:10.1039/c3sc50301a), 2013-01-01
Supplement: c3sc50301a.pdf [file c3sc50301a.pdf]

## Supporting Information to

### Electrochemical water splitting by gold: evidence for an oxide decomposition mechanism

Oscar Diaz-Morales<sup>1</sup>, Federico Calle-Vallejo<sup>1</sup>, Casper de Munck<sup>1</sup>, Marc T.M. Koper<sup>1,2</sup>.

<sup>1</sup>*Leiden Institute of Chemistry, Leiden University, PO Box 9502, 2300 RA Leiden, The Netherlands.*

<sup>2</sup>*Catalysis Research Center, Hokkaido University, Sapporo 001-0021, Japan.*

E-mail: [m.koper@chem.leidenuniv.nl](mailto:m.koper@chem.leidenuniv.nl)

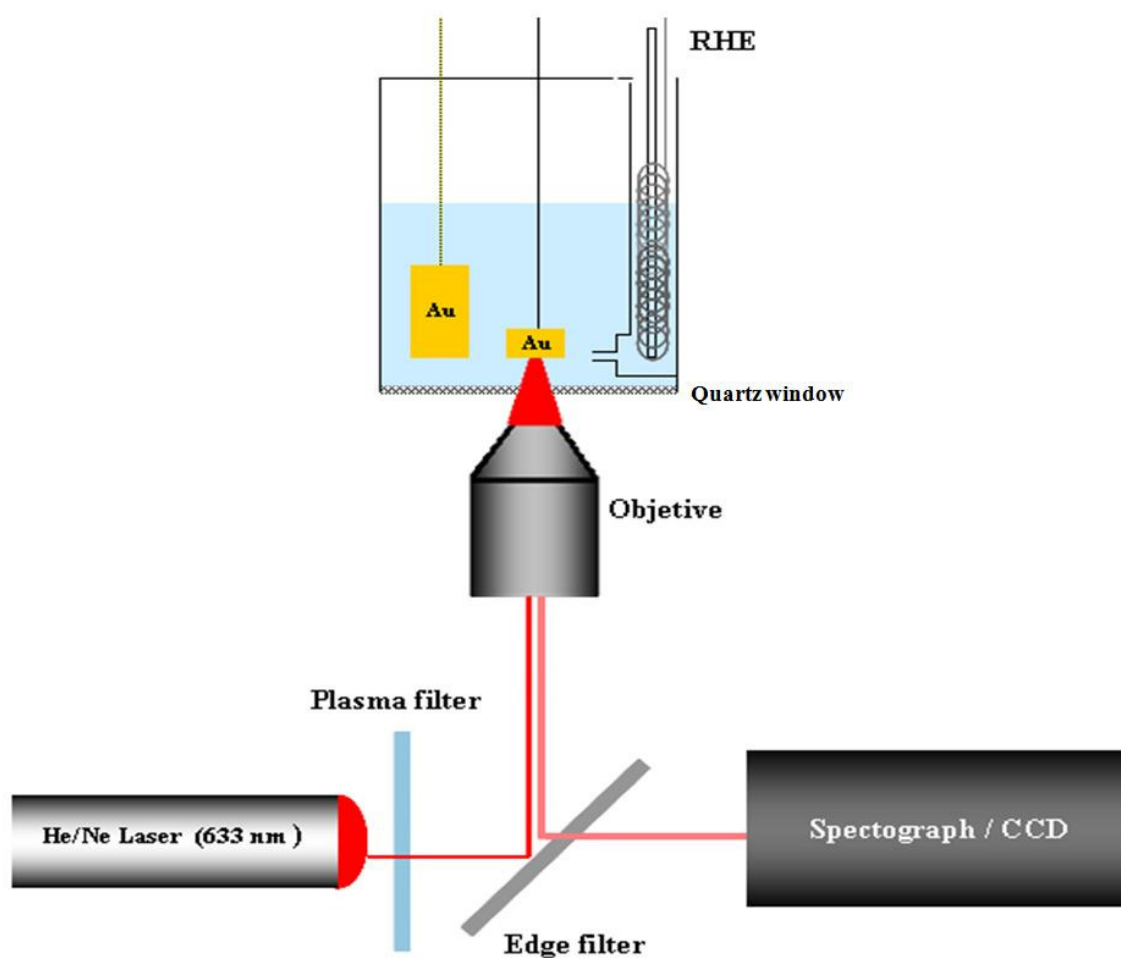

**Figure S1.** Schematic view of the Raman setup

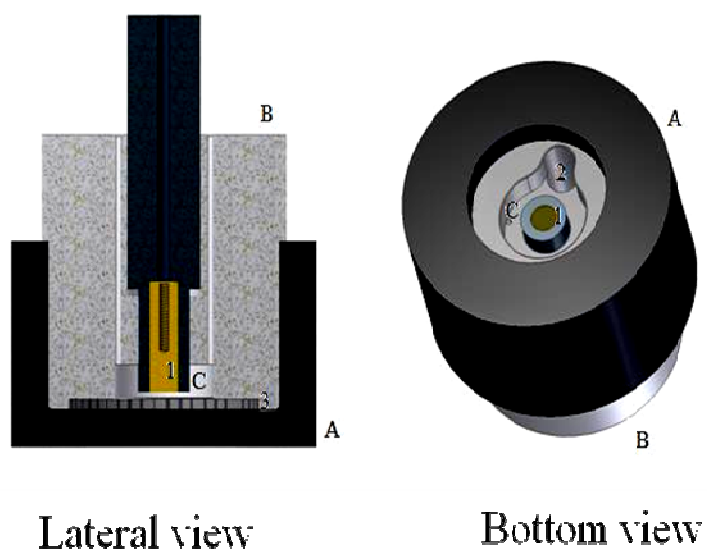

- A Kel-F scrolled base
- B Kel-F cell body
- C Electrochemical compartment
- 1 Working electrode
- 2 Reference electrode compartment
- 3 Quartz window

**Figure S2.** Electrochemical cell used for *in situ* Surface Enhanced Raman measurements.

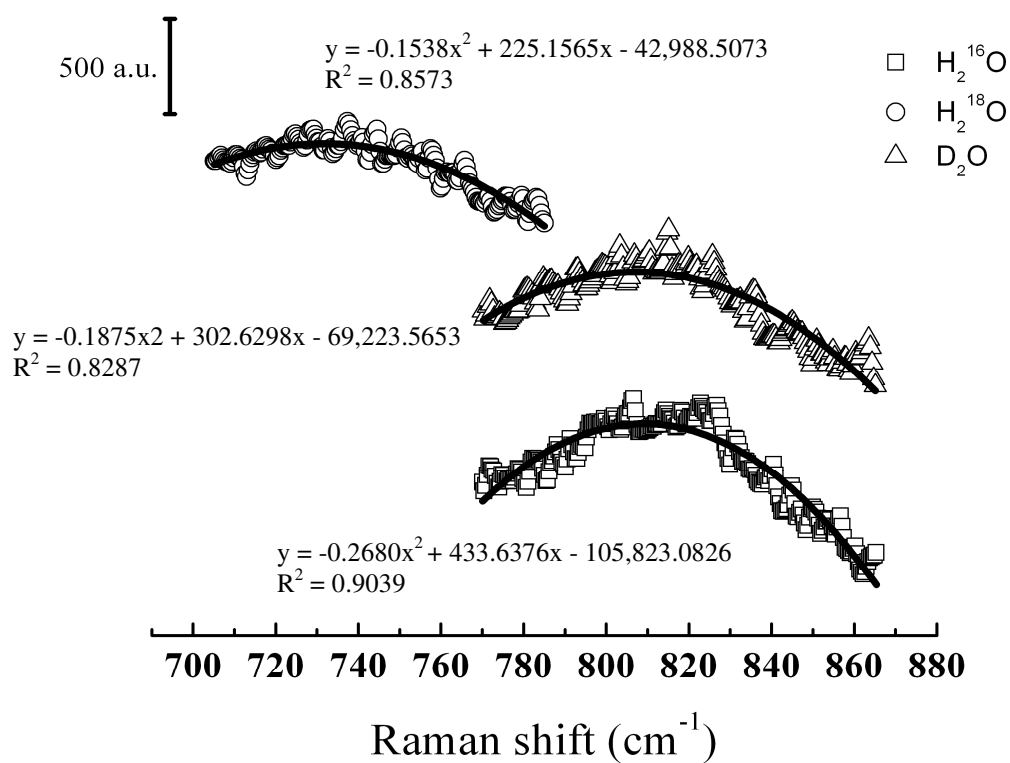

**Figure S3.** Raman spectrum acquired at 1.7 V vs. RHE in a pH=0 solution prepared with  $\text{H}_2^{16}\text{O}$ ,  $\text{H}_2^{18}\text{O}$  and  $\text{D}_2\text{O}$ , showing the polynomial fittings (second grade polynomial) used to determine the peak position.

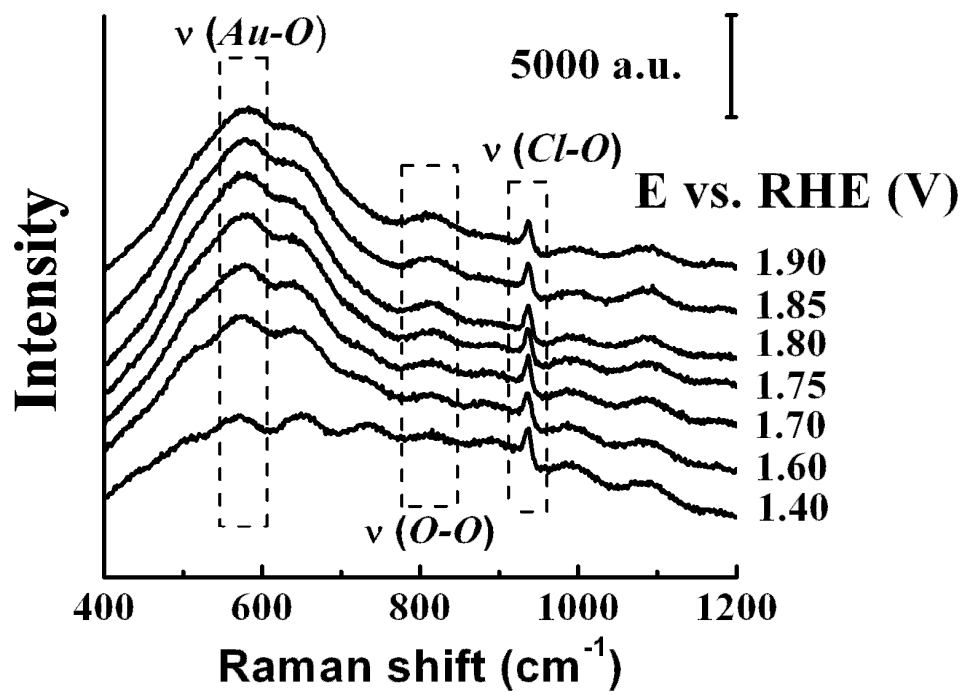

**Figure S3.** SERS spectra for oxygen evolution acquired at constant potential in pH=0 solution prepared in  $\text{D}_2\text{O}$ .
